# Supplementary material
Source: PubMed Central journal article supplement (PMC6434450)

**Table S1** Concentration ( $\mu\text{mol/g}$ ) of neurometabolites in A $\beta$ PP-PS1 and wild-type mice

| <b>Brain Region</b> | <b>Animal</b>    | <b>Glu</b>       | <b>GABA</b>   | <b>Gln</b>    | <b>Asp</b>      | <b>NAA</b>      | <b>m-Ino</b>    | <b>Tau</b>     | <b>Cho</b>      |
|---------------------|------------------|------------------|---------------|---------------|-----------------|-----------------|-----------------|----------------|-----------------|
| Cortex              | Wild-type        | 12.5 $\pm$ 0.2   | 2.5 $\pm$ 0.1 | 6.1 $\pm$ 0.2 | 2.4 $\pm$ 0.1   | 7.5 $\pm$ 0.2   | 7.2 $\pm$ 0.2   | 12.6 $\pm$ 0.3 | 1.78 $\pm$ 0.04 |
|                     | A $\beta$ PP-PS1 | 11.8 $\pm$ 0.1** | 2.5 $\pm$ 0.1 | 6.2 $\pm$ 0.1 | 2.1 $\pm$ 0.1** | 7.0 $\pm$ 0.1*  | 7.8 $\pm$ 0.2*  | 12.0 $\pm$ 0.3 | 1.76 $\pm$ 0.04 |
| Hippocampus         | Wild-type        | 11.8 $\pm$ 0.2   | 3.2 $\pm$ 0.2 | 5.8 $\pm$ 0.3 | 2.3 $\pm$ 0.1   | 7.6 $\pm$ 0.3   | 7.3 $\pm$ 0.3   | 11.5 $\pm$ 0.8 | 2.1 $\pm$ 0.1   |
|                     | A $\beta$ PP-PS1 | 10.7 $\pm$ 0.4*  | 3.2 $\pm$ 0.3 | 5.6 $\pm$ 0.2 | 2.0 $\pm$ 0.1*  | 6.5 $\pm$ 0.2** | 8.6 $\pm$ 0.3** | 12.3 $\pm$ 0.9 | 2.0 $\pm$ 0.1   |
| Striatum            | Wild-type        | 10.9 $\pm$ 0.4   | 5.2 $\pm$ 0.4 | 5.8 $\pm$ 0.3 | 2.0 $\pm$ 0.1   | 6.9 $\pm$ 0.2   | 7.7 $\pm$ 0.3   | 12.0 $\pm$ 0.6 | 2.2 $\pm$ 0.1   |
|                     | A $\beta$ PP-PS1 | 10.2 $\pm$ 0.2   | 4.7 $\pm$ 0.3 | 5.5 $\pm$ 0.2 | 1.9 $\pm$ 0.1   | 6.6 $\pm$ 0.2   | 8.0 $\pm$ 0.3   | 11.2 $\pm$ 0.2 | 2.2 $\pm$ 0.1   |

Concentration of brain metabolites were measured relative to [2-<sup>13</sup>C]glycine. Single factor ANOVA analysis was carried out to determine the significance of difference in the concentration of neurometabolites in a given brain regions. Values represent mean  $\pm$  SEM. \*  $p < 0.05$ , \*\*  $p < 0.01$  when A $\beta$ PP-PS1 mice were compared with controls.

**Figure S1** Immunohistological detection of amyloid plaque in A $\beta$ PP-PS1 mouse brain using A $\beta$ -antibody.

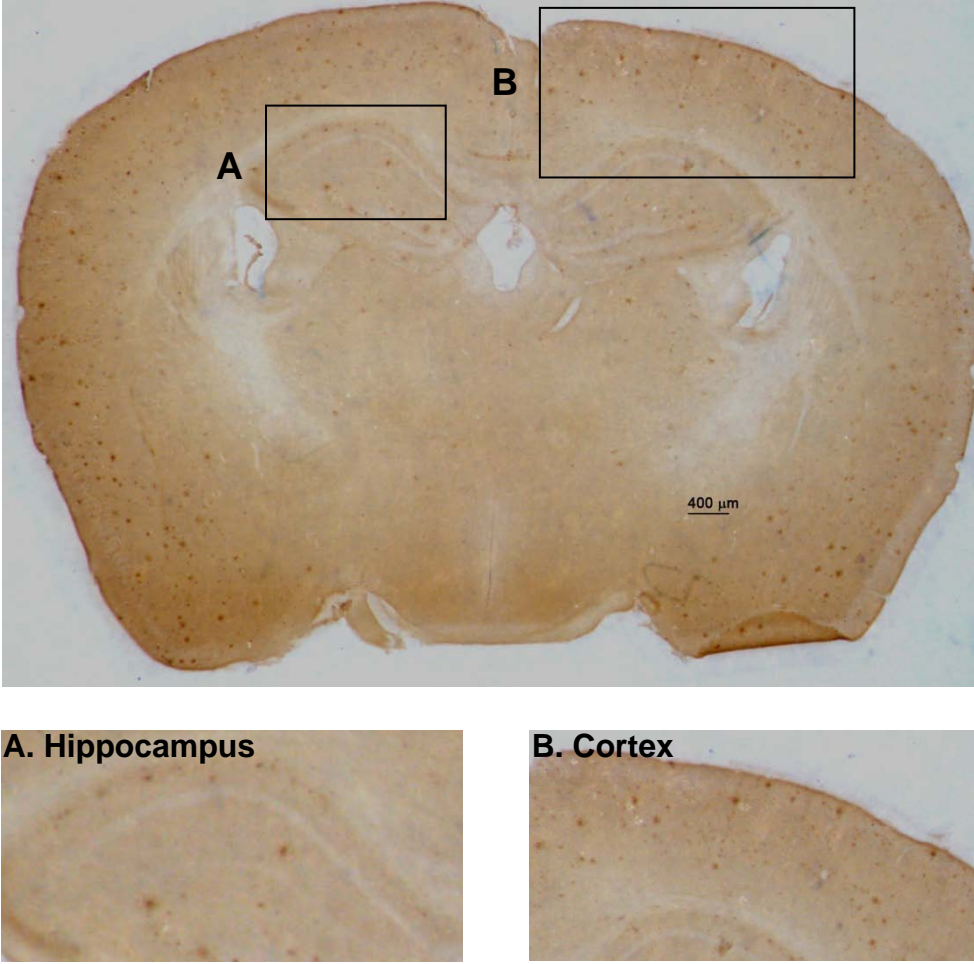

Supplement: JCB709463_supplementary_material.pdf [file JCB709463_supplementary_material.pdf]
